related with hypercytokinemia [5]. Whether antiviral treatment for these patients will provide benefit is not yet clear. More studies on viral load profiles among hospitalized patients with influenza and clinical trials of late antiviral therapy are needed to resolve the issue.

## Acknowledgments

**Potential conflicts of interest.** All authors: no conflicts.

N. Lee,<sup>1</sup> C. S. Cockram,<sup>1</sup> P. K. S. Chan,<sup>2</sup>  
D. S. C. Hui,<sup>1</sup> K. W. Choi,<sup>1</sup> and J. J. Y. Sung<sup>1</sup>

Departments of <sup>1</sup>Medicine and Therapeutics and <sup>2</sup>Microbiology, The Chinese University of Hong Kong, Hong Kong

## References

1. McGeer A, Green KA, Plevneshi A, et al. Antiviral therapy and outcomes of influenza requiring hospitalization in Ontario, Canada. *Clin Infect Dis* 2007; 45:1568–75.
2. Lee N, Chan PKS, Choi KW, et al. Factors associated with early hospital discharge of adult influenza patients. *Antiviral Therapy* 2007; 12: 501–8.
3. Ong AK, Hayden FG. John F. Enders Lecture 2006: antivirals for influenza. *J Infect Dis* 2007; 196:181–90.
4. Crusat M, de Jong MD. Neuraminidase inhibitors and their role in avian and pandemic influenza. *Antiviral Therapy* 2007; 12:593–602.
5. Lee N, Wong CK, Chan PKS, et al. Hypercytokinemia and hyperactivation of phospho-p38 mitogen-activated protein kinase in severe human influenza A infections. *Clin Infect Dis* 2007; 45:723–31.

Reprints or correspondence: Dr. Nelson Lee, Div. of Infectious Diseases, Dept. of Medicine and Therapeutics, The Chinese University of Hong Kong, 9/F, Clinical Sciences Bldg., Prince of Wales Hospital, Shatin, Hong Kong Special Administrative Region, People's Republic of China (leelsn@cuhk.edu.hk).

**Clinical Infectious Diseases** 2008;46:1323–4

© 2008 by the Infectious Diseases Society of America. All rights reserved. 1058-4838/2008/4608-0033\$15.00  
DOI: 10.1086/533477

## Increased Antimicrobial Susceptibility Profiles among Polymyxin-Resistant *Acinetobacter baumannii* Clinical Isolates

TO THE EDITOR—We read with great interest the article by Li et al. [1], in which the authors reported promising therapeutic options for treatment of infections caused by colistin-resistant *Acinetobacter*

*baumannii*. The authors observed overall increased antimicrobial susceptibility among colistin-resistant strains, compared with the parent colistin-susceptible strains. Because of the potential therapeutic importance of this observation, we evaluated the susceptibility profiles of polymyxin-resistant and -susceptible *A. baumannii* clinical isolates collected as part of the global SENTRY Antimicrobial Surveillance Program during the period 2001–2007 [2].

A collection of 3707 *A. baumannii* isolates were tested for susceptibility to numerous antimicrobial agents using validated broth microdilution panels with cation-adjusted Mueller-Hinton medium (TREK Diagnostics) [3]. Testing and incubation were performed according to the methods of the Clinical and Laboratory Standards Institute [4]. MICs were interpreted as specified by the Clinical and Laboratory Standards Institute [5], except for tigecycline MICs, which were interpreted according to breakpoints approved by the US Food and Drug Administration (breakpoint for susceptibility,  $\leq 2 \mu\text{g/mL}$ ; breakpoint for resistance,  $\geq 8 \mu\text{g/mL}$ ). For comparison purposes, geographically unrelated polymyxin-resistant isolates were included in this study, and the resistance phenotype was confirmed by Etest (AB Biodisk). Susceptibility rates for polymyxin-resistant isolates were compared with those for polymyxin-susceptible isolates by  $\chi^2$  test, using EpiInfo, version 3.4.1 (Centers for Disease Control and Prevention).  $P < .05$  was considered to be statistically significant.

The distribution of MIC<sub>50</sub> and susceptibility rates among polymyxin-resistant and -susceptible *A. baumannii* for selected antimicrobial agents are shown in table 1. Most drugs demonstrated limited spectrums of activity against the polymyxin-susceptible group (susceptibility rate,  $\leq 53.8\%$ ), except for the carbapenems (imipenem [71.6% susceptible] and meropenem [68.0% susceptible]), tetracyclines (doxycycline [74.6% susceptible], minocycline [88.4% susceptible], and ti-

gacycline [97.0% inhibited at  $\leq 2 \mu\text{g/mL}$ ]). Overall, compared with the polymyxin-susceptible group, the polymyxin-resistant group showed higher susceptibility rates for the majority of antimicrobial agents (16 of 22 antimicrobial agents). The differences were mostly observed among those drugs showing lower susceptibility rates ( $\leq 48.8\%$ ) and were statistically significant for the  $\beta$ -lactams ampicillin-sulbactam, aztreonam, cefoxitin, cefepime, ceftriaxone, and cefuroxime ( $P < .05$ ). In contrast, antimicrobial agents with better activity, such as imipenem, meropenem, tobramycin, minocycline, and tigecycline, showed similar or slightly higher activity against the polymyxin-susceptible isolates, compared with the polymyxin-resistant isolates.

Overall, these results corroborate with those previously reported by Li et al. [1], except for the results for ticarcillin-clavulanate and carbapenems, for which the authors noted substantially lower MICs among the colistin-resistant group, compared with the colistin-susceptible group. On the other hand, compared with our group of polymyxin-susceptible isolates, our collection of polymyxin-resistant clinical isolates showed higher susceptibility rates for amikacin, tetracycline, and trimethoprim-sulfamethoxazole—results not observed previously by Li et al. [1].

Li et al. suggested that *A. baumannii* showing phenotypic resistance to colistin may possess outer-membrane modifications, consequently increasing permeability for antimicrobial agents, which may also explain the results obtained in our study. Regardless of the changes, they were not favorable for those antimicrobial agents frequently used for treatment of infections caused by multidrug-resistant *A. baumannii*, such as the carbapenems and tobramycin. Furthermore, minocycline and the novel glycylcycline tigecycline, which may represent a valuable antimicrobial for treatment of infections caused by multidrug-resistant *A. baumannii* [6], were highly active independently of the polymyxin susceptibility profile.

**Table 1. MIC<sub>50</sub>, antimicrobial susceptibility profile, and susceptibility rates of 3683 polymyxin-susceptible and 24 polymyxin-resistant *Acinetobacter baumannii* isolates.**

| Antimicrobial agent           | Polymyxin-susceptible phenotype <sup>a</sup> |                        | Polymyxin-resistant phenotype <sup>a</sup> |                        | P <sup>b</sup> | OR (95 CI) <sup>c</sup> |
|-------------------------------|----------------------------------------------|------------------------|--------------------------------------------|------------------------|----------------|-------------------------|
|                               | MIC <sub>50</sub> , µg/mL                    | Susceptibility rate, % | MIC <sub>50</sub> , µg/mL                  | Susceptibility rate, % |                |                         |
| Ampicillin-sulbactam          | 16                                           | 45.4                   | 4                                          | 70.8                   | .013           | 2.92 (1.14–7.76)        |
| Piperacillin                  | >64                                          | 21.0                   | 64                                         | 33.3                   | .138           | 1.88 (0.74–4.69)        |
| Piperacillin-tazobactam       | >64                                          | 33.2                   | 32                                         | 45.8                   | .187           | 1.71 (0.71–4.07)        |
| Ticarcillin-clavulanate       | 128                                          | 29.3                   | 64                                         | 33.3                   | .762           | 1.14 (0.54–2.83)        |
| Aztreonam                     | >16                                          | 4.9                    | >16                                        | 20.8                   | <.001          | 5.21 (1.68–15.0)        |
| Cefoxitin                     | >16                                          | 0.9                    | >16                                        | 20.8                   | <.001          | 30.0 (9.18–92.4)        |
| Cefepime                      | 16                                           | 38.4                   | 4                                          | 58.3                   | .046           | 2.24 (0.93–5.44)        |
| Ceftazidime                   | >16                                          | 34.5                   | >16                                        | 45.8                   | .240           | 1.61 (0.67–3.84)        |
| Ceftriaxone                   | >32                                          | 16.2                   | 32                                         | 41.6                   | <.001          | 3.7 (1.52–8.89)         |
| Cefuroxime                    | >16                                          | 2.6                    | >16                                        | 25.0                   | <.001          | 12.72 (4.41–34.97)      |
| Imipenem                      | 1                                            | 71.6                   | 1                                          | 66.6                   | .589           | 0.79 (0.32–2.02)        |
| Meropenem                     | 2                                            | 68.0                   | 4                                          | 58.3                   | .314           | 0.66 (0.28–1.60)        |
| Ciprofloxacin                 | >4                                           | 32.7                   | 1                                          | 50.0                   | .072           | 2.06 (0.86–4.90)        |
| Levofloxacin                  | >4                                           | 35.6                   | ≤0.5                                       | 50.0                   | .142           | 1.81 (0.76–4.31)        |
| Amikacin                      | 32                                           | 48.8                   | 8                                          | 58.3                   | .355           | 1.46 (0.61–3.55)        |
| Gentamicin                    | >8                                           | 37.0                   | 4                                          | 50.0                   | .190           | 1.70 (0.71–4.05)        |
| Tobramycin                    | 4                                            | 53.8                   | 8                                          | 45.8                   | .434           | 0.73 (0.30–1.73)        |
| Minocycline                   | ≤1                                           | 88.4                   | ≤1                                         | 87.5                   | .885           | 0.91 (0.26–3.89)        |
| Tigecycline                   | 0.5                                          | 97.0                   | 0.5                                        | 95.8                   | .729           | 0.70 (0.10–14.16)       |
| Doxycycline                   | ≤1                                           | 74.6                   | ≤1                                         | 87.5                   | .150           | 2.37 (0.67–10.03)       |
| Tetracycline                  | 8                                            | 43.1                   | ≤4                                         | 58.3                   | .133           | 1.85 (0.77–4.49)        |
| Trimethoprim-sulfamethoxazole | >2                                           | 37.9                   | ≤2                                         | 54.2                   | .420           | 1.39 (0.58–3.31)        |

<sup>a</sup> The category of susceptibility for polymyxin was determined as specified by the Clinical and Laboratory Standards Institute [5], except for tigecycline, which was interpreted according to the breakpoints approved by the US Food and Drug Administration (≤2 µg/mL for susceptible and ≥8 µg/mL for resistant).

<sup>b</sup> Calculated by  $\chi^2$  test.

<sup>c</sup> ORs and respective 95% CIs refer to comparisons of susceptibility rates between polymyxin-resistant *A. baumannii* and polymyxin-susceptible *A. baumannii* for each antimicrobial agent.

In addition, it is important to mention that other resistance mechanisms were present among the polymyxin-resistant isolates when the antimicrobial agents did not become satisfactorily more active; however, the susceptibility rate for ampicillin-sulbactam increased substantially among those isolates (from 45.4% to 70.8%) (table 1). In summary, this study complements the data reported previously [1], providing additional insights for combination therapeutic options and for possible novel antimicrobial agents in development, and indicates that local susceptibility testing results will be important in guiding treatment.

## Acknowledgments

**Potential conflicts of interest.** R.N.J., T.R.F., and H.S.S. have received research and/or education grants from AB Biodisk, Abbott, API, Arpida, Astellas, AstraZeneca, Avexa, Bayer, bioMérieux, Cadence, Cempira, Cerexa, Chiron, Cornerstone, Cubist, Daiichi, Elan, Elanco, Enanta, Glaxo-SmithKline, Johnson & Johnson (Ortho McNeil), Merck, Novartis, Optimer, Ordway, Osmotics, Pacific Beach, Peninsula, Pfizer, Protez, Replidyne, Schering-Plough, Sequoia, Shionogi, Theravance, TREK Diagnostics, ViroPharma, and Wyeth. R.E.M.: no conflicts.

**Rodrigo E. Mendes,<sup>1</sup> Thomas R. Fritsche,<sup>1</sup> Helio S. Sader,<sup>1,2</sup> and Ronald N. Jones<sup>1,3</sup>**

<sup>1</sup>JMI Laboratories, North Liberty, Iowa; <sup>2</sup>Universidade Federal de São Paulo, São Paulo, Brazil; and <sup>3</sup>Tufts University School of Medicine, Boston, Massachusetts

## References

- Li J, Nation RL, Owen RJ, Wong S, Spelman D, Franklin C. Antibiograms of multidrug-resistant clinical *Acinetobacter baumannii*: promising therapeutic options for treatment of infection with colistin-resistant strains. *Clin Infect Dis* 2007;45:594–8.
- Jones RN. Global epidemiology of antimicrobial resistance among community-acquired and nosocomial pathogens: a five-year summary from the SENTRY Antimicrobial Surveillance Program (1997–2001). *Sem Respir Crit Care Med* 2003;24:121–34.
- Gales AC, Jones RN, Sader HS. Global assessment of the antimicrobial activity of polymyxin B against 54,731 clinical isolates of gram-negative bacilli: report from the SENTRY Antimicrobial Surveillance Programme (2001–2004). *Clin Microbiol Infect* 2006;12:315–21.
- Clinical and Laboratory Standards Institute.

Methods for dilution antimicrobial susceptibility tests for bacteria that grow aerobically: approved standard. 7th ed. CLSI document M7-A7. Wayne, PA: CLSI, 2006.

5. Clinical and Laboratory Standards Institute. Performance standards for antimicrobial susceptibility testing: 17th informational supplement. CLSI document M100-S17. Wayne, PA: CLSI, 2007.
6. Jones RN, Ferraro MJ, Reller LB, Schreckenberger PC, Swenson JM, Sader HS. Multicenter studies of tigecycline disk diffusion susceptibility results for *Acinetobacter* spp. *J Clin Microbiol* 2007; 45:227–30.

Reprints or correspondence: Dr. Rodrigo E. Mendes, JMI Laboratories, 345 Beaver Creek Centre, Ste. A, North Liberty, IA 52317 (rodrigo-mendes@jmilabs.com).

**Clinical Infectious Diseases** 2008;46:1324–6

© 2008 by the Infectious Diseases Society of America. All rights reserved. 1058-4838/2008/4608-0034\$15.00

DOI: 10.1086/533476
